# Supplementary material for: A Rice Gene of De Novo Origin Negatively Regulates Pathogen-Induced Defense Response
Source: PubMed Central journal article supplement (PMC2643483; doi:10.1371/journal.pone.0004603), 2009-02-25
Supplement: pone.0004603.s007.pdf [file pone.0004603.s007.pdf]

**Table S1.** Performance of T<sub>0</sub> *OsDRI0*-suppressed plants (D27RMH) to *Xoo* strains PXO61 and PXO99

| Rice material            | PXO61                        |                       | PXO99                        |                       |
|--------------------------|------------------------------|-----------------------|------------------------------|-----------------------|
|                          | Lesion area (%) <sup>a</sup> | <i>P</i> <sup>c</sup> | Lesion area (%) <sup>a</sup> | <i>P</i> <sup>c</sup> |
| D27RMH2                  | 32.0 ± 4.9                   | 0.5313                | 56.3 ± 6.6                   | 0.3593                |
| D27RMH3                  | 12.3 ± 5.7                   | 0.0000                | 22.7 ± 3.5                   | 0.0000                |
| D27RMH4                  | 36.6 ± 5.9                   | 0.3287                | 60.1 ± 6.2                   | 0.9382                |
| D27RMH6                  | 18.3 ± 7.4                   | 0.0012                | 33.4 ± 8.5                   | 0.0000                |
| D27RMH7                  | 20.1 ± 5.9                   | 0.0017                | 31.3 ± 6.0                   | 0.0000                |
| D27RMH8                  | 23.6 ± 3.2                   | 0.0069                | 42.7 ± 3.8                   | 0.0016                |
| D27RMH9                  | 22.6 ± 3.2                   | 0.0030                | 29.7 ± 9.9                   | 0.0000                |
| D27RMH10                 | 13.6 ± 3.8                   | 0.0000                | 29.5 ± 8.2                   | 0.0000                |
| D27RMH11                 | 32.5 ± 3.6                   | 0.5817                | 55.0 ± 8.9                   | 0.2501                |
| D27RMH12                 | 23.2 ± 7.2                   | 0.0089                | 45.0 ± 4.9                   | 0.0078                |
| D27RMH13                 | 17.4 ± 3.2                   | 0.0000                | 21.5 ± 8.9                   | 0.0000                |
| D27RMH14 <sup>b</sup>    | 39.4 ± 5.9                   | 0.0649                | 55.4 ± 7.2                   | 0.2592                |
| D27RMH15                 | 14.4 ± 5.2                   | 0.0000                | 19.7 ± 6.2                   | 0.0000                |
| D27RMH17                 | 9.8 ± 4.6                    | 0.0000                | 16.3 ± 3.4                   | 0.0000                |
| D27RMH18                 | 14.7 ± 3.5                   | 0.0000                | 30.7 ± 10.0                  | 0.0000                |
| D27RMH19 <sup>b</sup>    | 36.3 ± 2.5                   | 0.3155                | 54.9 ± 5.7                   | 0.1978                |
| D27RMH20                 | 37.8 ± 4.9                   | 0.1546                | 60.4 ± 5.7                   | 0.8762                |
| D27RMH21                 | 36.3 ± 4.8                   | 0.3613                | 59.5 ± 10.5                  | 0.9405                |
| D27RMH22                 | 17.6 ± 4.1                   | 0.0000                | 22.1 ± 5.6                   | 0.0000                |
| D27RMH23                 | 34.4 ± 4.8                   | 0.8436                | 60.1 ± 7.9                   | 0.9505                |
| D27RMH24                 | 32.0 ± 5.4                   | 0.4948                | 53.2 ± 10.7                  | 0.1530                |
| D27RMH25                 | 14.5 ± 7.8                   | 0.0000                | 22.8 ± 6.2                   | 0.0000                |
| D27RMH26 <sup>b</sup>    | 35.1 ± 2.6                   | 0.6277                | 60.9 ± 7.2                   | 0.7733                |
| Minghui63<br>(wild type) | 33.8 ± 4.9                   |                       | 59.8 ± 7.2                   |                       |

<sup>a</sup>For most of the plants, four to five uppermost fully expanded leaves of each plant were inoculated. The lesion area was recoded at 21 d after bacterial inoculation.

<sup>b</sup>The negative transgenic plants detected by PCR analysis.

<sup>c</sup>Each *P* value was calculated in comparison with wild type.
