# Supplementary material for: A Rice Gene of De Novo Origin Negatively Regulates Pathogen-Induced Defense Response
Source: PLOS journal article supplement (doi:10.1371/journal.pone.0004603), 2009-02-25
Supplement: S4 (10.1371/journal.pone.0004603.s004) [file journal.pone.0004603.s004.pdf › journal.pone.0004603.s004.pdf]

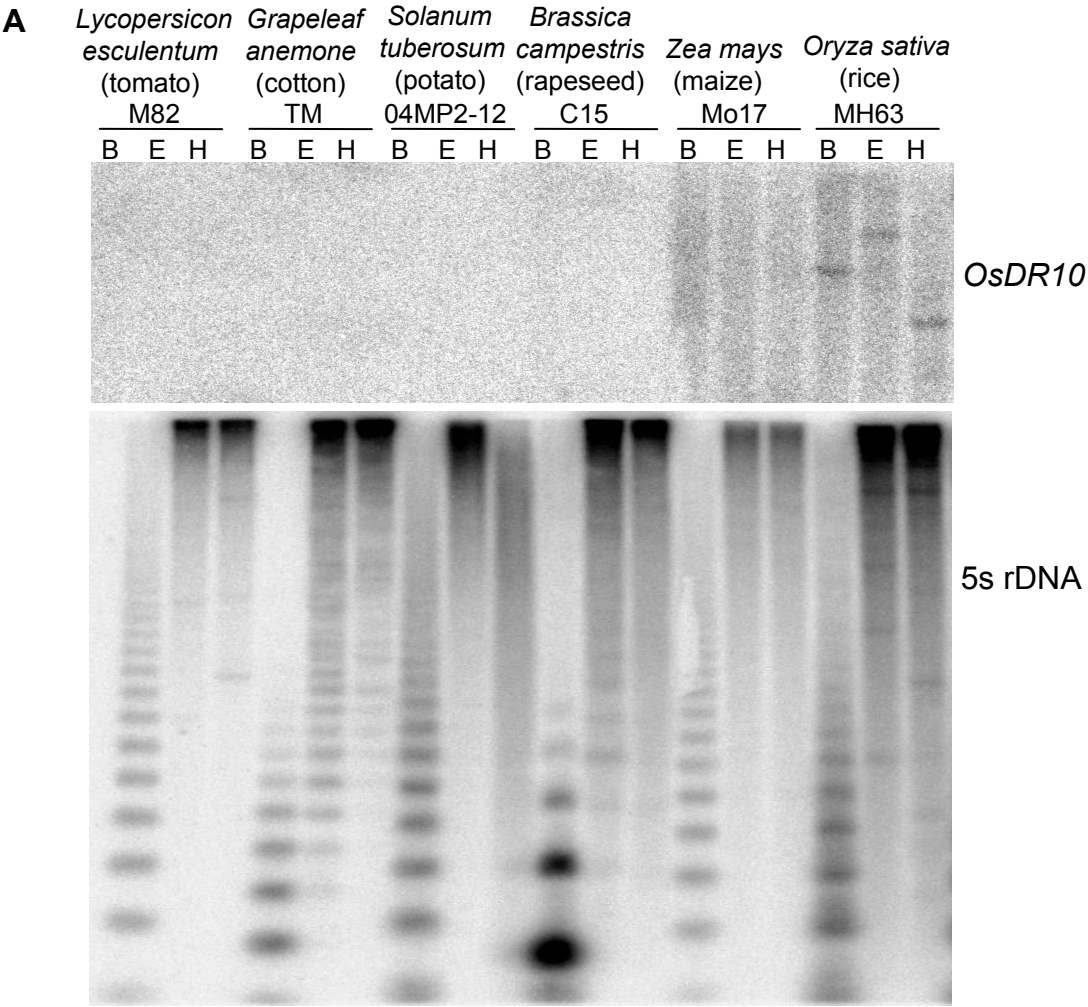

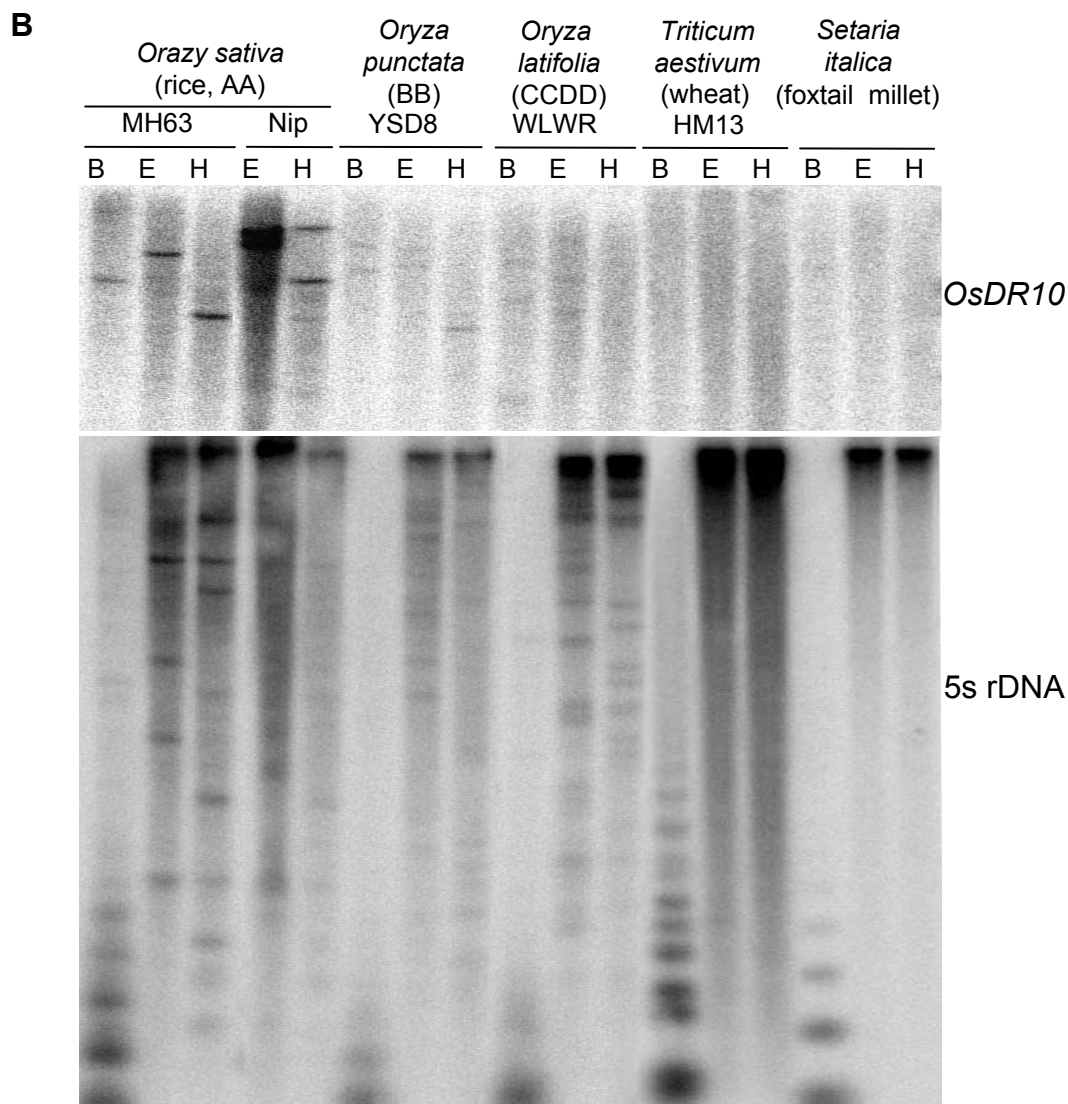

**Figure S4. DNA gel blot analysis of *OsDR10*-homologous gene in different plant species.** MH63 (Minghui 63) is *indica* rice line and NIP (Nipponbare) is *japonica* rice line. B, *Bam*HI; E, *Eco*RI; H, *Hind*III. (A) and (B) No *OsDR10* homologous sequence was detected in plants other than rice. Rice 5s rDNA probe amplified using primers 5srDNAF (5'-GGATGC GATCATACCAGCAC-3') and 5srDNAR (5'-GGGATGCAACACAAGGACTTC-3') was used to examine the quality of DNA for DNA gel blot analysis.
