# Supplementary material for: A Rice Gene of De Novo Origin Negatively Regulates Pathogen-Induced Defense Response
Source: PLOS journal article supplement (doi:10.1371/journal.pone.0004603), 2009-02-25
Supplement: S5 (10.1371/journal.pone.0004603.s005) [file journal.pone.0004603.s005.pdf › journal.pone.0004603.s005.pdf]

|                               |     |     |     |     |     |     |     |     |      |     |      |     |      |     |     |     |     |     |
|-------------------------------|-----|-----|-----|-----|-----|-----|-----|-----|------|-----|------|-----|------|-----|-----|-----|-----|-----|
| <i>OsDR10</i>                 | ATG | GCG | TTC | TAC | AAG | TAC | GGC | TTC | GCC  | TTC | TTG  | GCC | GGC  | ACC | GGC | TTC | GGC | 51  |
| <i>OsDR10-9311A</i>           | ... | ... | ... | ... | ... | ... | ... | ... | ...  | ... | ...  | ... | ...  | ... | ... | ... | ... | 51  |
| <i>OsDR10-NipponbareA</i>     | ... | ... | ... | ... | ... | ... | ... | ... | ...  | ... | ...  | ... | ...  | ... | ... | ... | ... | 51  |
| <i>OsDR10-O.rufipogonA</i>    | ... | ... | ... | ... | ... | ... | ... | ... | ...  | ... | ...  | ... | ...  | ... | ... | ... | ... | 51  |
| <i>OsDR10-O.rufipogonB</i>    | ... | ... | ... | ... | ... | ... | ... | ... | ...  | ... | ...  | ... | ...  | ... | ... | ... | ... | 51  |
| <i>OsDR10-9311B</i>           | ... | ... | ... | ... | ... | ... | ... | ... | ...  | ... | ...  | ... | ...  | ... | ... | ... | ... | 51  |
| <i>OsDR10-NipponbareB</i>     | ... | ... | ... | ... | ... | ... | ... | ... | ...  | ... | ...  | ... | ...  | ... | ... | ... | ... | 51  |
| <i>OsDR10-Nackdong</i>        | ... | ... | ... | ... | ... | ... | ... | ... | ...  | ... | ...  | ... | ...  | ... | ... | ... | ... | 51  |
| <i>OsDR10-O.punctata</i>      | ... | ... | ... | ... | ... | ... | ..G | ... | ...  | ... | ...  | ... | ...  | ... | ... | --- | --- | 45  |
| <i>OsDR10-O.latifolia</i>     | ... | ... | ... | ... | ... | ... | ..G | ... | ...  | ... | ...  | ... | ...  | ... | ... | ... | ... | 51  |
| <i>OsDR10-O.australiensis</i> | ... | ... | ... | ... | ... | ... | ..G | ... | ..T  | ... | ...  | ... | ...  | ... | ... | ... | ... | 51  |
| <i>OsDR10-L.tisserantii</i>   | ... | ... | ... | ... | ... | ... | ... | ... | ...  | ... | ...  | ... | ...  | ... | ... | ... | ... | 51  |
| <i>OsDR10-L.JX</i>            | ... | ... | ... | ... | ... | ... | ..G | ... | ...  | ... | ...  | ... | ...  | ... | ... | ... | ... | 51  |
| <i>OsDR10</i>                 | GCC | GCG | CTC | ACC | AGC | CTC | CGC | CGC | GAC  | GGC | GAC  | AGC | TGC  | TGC | CCC | ATG | CGC | 102 |
| <i>OsDR10-9311A</i>           | ... | ... | ... | ... | ... | ... | ... | ... | ...  | ... | ...  | ... | ...  | ... | ... | ... | ... | 102 |
| <i>OsDR10-NipponbareA</i>     | ... | ... | ... | ... | ... | ... | ... | ... | ...  | ... | ...  | ... | ...  | ... | ... | ... | ... | 102 |
| <i>OsDR10-O.rufipogonA</i>    | ... | ... | ... | ... | ... | ... | ... | ... | ...  | ... | ...  | ... | ...  | ... | ... | ... | ... | 102 |
| <i>OsDR10-O.rufipogonB</i>    | ... | ... | ... | ... | ... | ... | ... | ... | ...  | ... | ...  | ... | ...  | ... | ... | ... | ... | 102 |
| <i>OsDR10-9311B</i>           | ... | ... | ... | ... | ... | ... | ... | ... | ...  | ... | ...  | ... | ...  | ... | ... | ... | ... | 102 |
| <i>OsDR10-NipponbareB</i>     | ... | ... | ... | ... | ... | ... | ... | ... | ...  | ... | ...  | ... | ...  | ... | ... | ... | ... | 102 |
| <i>OsDR10-Nackdong</i>        | ... | ... | ... | ... | ... | ... | ... | ... | ...  | ... | ...  | ... | ...  | ... | ... | ... | ... | 102 |
| <i>OsDR10-O.punctata</i>      | --- | ... | ..G | ... | ... | ... | ... | ... | ...  | ... | ...  | --- | ---  | ... | ... | C.C | ... | 87  |
| <i>OsDR10-O.latifolia</i>     | ... | ... | ..G | ..G | ... | ... | ... | ... | ...  | C.. | ---  | --- | ---  | ... | ... | C.C | .AT | 96  |
| <i>OsDR10-O.australiensis</i> | ... | ... | ..G | ..G | ... | ... | ... | ... | ...  | C.. | ---  | --- | ---  | ... | ... | C.C | .AT | 96  |
| <i>OsDR10-L.tisserantii</i>   | ... | ... | ..G | ... | ... | ... | ... | ... | ...  | --- | ---  | --- | ---  | ... | ... | C.C | .A. | 93  |
| <i>OsDR10-L.JX</i>            | ... | ... | ..G | ..G | ... | ... | ... | ... | ...  | C.. | ---  | --- | ---  | ... | ... | C.C | .AT | 96  |
| <i>OsDR10</i>                 | CGC | CGC | CAC | CGC | CGC | TGT | --- | --- | ---  | CGC | CGC  | CGC | ---  | CAC | GAC | GAC | GAC | 141 |
| <i>OsDR10-9311A</i>           | ... | ... | ... | ... | ... | ... | --- | --- | ---  | ... | ...  | ... | ---  | ... | ... | ... | ... | 141 |
| <i>OsDR10-NipponbareA</i>     | ... | ... | ... | ... | ... | ... | --- | --- | ---  | ... | ...  | ... | ---  | ... | ... | ... | ... | 141 |
| <i>OsDR10-O.rufipogonA</i>    | ... | ... | ... | ... | ... | ... | --- | --- | ---  | ... | ...  | ... | ---  | ... | ... | ... | ... | 141 |
| <i>OsDR10-O.rufipogonB</i>    | ... | ... | ... | ... | ... | ... | --- | --- | ---  | ... | ...  | ... | ---  | ... | ... | ... | ... | 141 |
| <i>OsDR10-9311B</i>           | ... | ... | ..G | ... | ... | ... | --- | --- | ---  | ... | ...  | ..A | CAC  | ... | ... | ... | ... | 144 |
| <i>OsDR10-NipponbareB</i>     | ... | ... | ..G | ... | ... | ... | --- | --- | ---  | ... | ...  | ..A | CAC  | ... | ... | ... | ... | 144 |
| <i>OsDR10-Nackdong</i>        | ... | ... | ..G | ... | ... | ... | --- | --- | ---  | ... | ...  | ..A | CAC  | ... | ... | ... | ... | 144 |
| <i>OsDR10-O.punctata</i>      | ... | ... | ... | --- | T.. | ..C | CAC | --- | ---  | ... | ...  | ..T | TGT  | ... | ... | ... | ... | 129 |
| <i>OsDR10-O.latifolia</i>     | ... | ... | ... | --- | T.. | ..C | CAC | CAC | CAT  | ... | ...  | .AT | CGC  | ..T | ... | C.. | ... | 144 |
| <i>OsDR10-O.australiensis</i> | ... | ... | ... | --- | T.. | ..C | CAC | CAC | CAT  | ... | ...  | .AT | CGC  | ..T | ... | C.. | ... | 144 |
| <i>OsDR10-L.tisserantii</i>   | ..A | ..G | ..G | .AT | T.. | ..C | CAC | CAT | CAC  | ... | ...  | ... | ---  | G.. | ... | ... | ..G | 141 |
| <i>OsDR10-L.JX</i>            | ... | ... | ... | --- | T.. | ..C | CAC | CAC | CAC  | ... | ..T  | ... | ---  | T.. | ... | C.. | ... | 141 |
| <i>OsDR10</i>                 | GAC | --- | --- | --- | --- | --- | CAG | CTG | GTC  | GAC | GGC  | GAC | GGC  | --- | --- | GAG | GCT | 171 |
| <i>OsDR10-9311A</i>           | ... | --- | --- | --- | --- | --- | ... | ... | ...  | ... | ...  | ... | ---  | --- | ... | ... | ... | 171 |
| <i>OsDR10-NipponbareA</i>     | ... | --- | --- | --- | --- | --- | ... | ... | ...  | ... | ...  | ... | ---  | --- | ... | ... | ... | 171 |
| <i>OsDR10-O.rufipogonA</i>    | ... | --- | --- | --- | --- | --- | ... | ... | ...  | ... | ...  | ... | ---  | --- | ... | ... | ... | 171 |
| <i>OsDR10-O.rufipogonB</i>    | ... | --- | --- | --- | --- | --- | ... | ... | ...  | ... | ...  | ... | ---  | --- | ... | ... | ... | 171 |
| <i>OsDR10-9311B</i>           | ... | --- | --- | --- | --- | --- | ... | ... | ...  | ... | ...  | ... | GAC  | GGC | ... | ... | ... | 180 |
| <i>OsDR10-NipponbareB</i>     | ... | --- | --- | --- | --- | --- | ... | ... | ...  | ... | ...  | ... | GAC  | GGC | ... | ... | ... | 180 |
| <i>OsDR10-Nackdong</i>        | ... | --- | --- | --- | --- | --- | ... | ... | ...  | ... | ...  | ... | GAC  | GGC | ... | ... | ... | 180 |
| <i>OsDR10-O.punctata</i>      | ..  | CAC | CAC | --- | CAC | CAC | ACC | GCC | ..AG | C.G | ..TG | ..G | ..G  | GGC | AAG | ..A | ... | 177 |
| <i>OsDR10-O.latifolia</i>     | A.. | GAC | GAG | --- | --- | CAT | --- | A.C | ..A  | ..G | ATG  | ..G | ..CG | AAA | AAA | ... | ... | 186 |
| <i>OsDR10-O.australiensis</i> | A.. | GAC | GAG | --- | --- | CAC | --- | A.C | ..C  | ..G | ATG  | ..G | ..CG | AAG | AAC | ... | ... | 186 |
| <i>OsDR10-L.tisserantii</i>   | ... | CAC | CGG | AAT | CAC | CAC | ACC | GCC | ..A  | ..G | A.G  | A.T | ..AA | AGG | GAT | ..A | ... | 192 |
| <i>OsDR10-L.JX</i>            | ... | --- | --- | --- | --- | CAC | ACC | GCC | ..A  | ..G | ATG  | ..T | ---  | GAC | AAG | ... | ..A | 177 |

|                               |                                                                            |     |
|-------------------------------|----------------------------------------------------------------------------|-----|
| <i>OsDR10</i>                 | GCA GGG GAA GAG CGA --- TAC --- --- AAG GAG AGC AAG AGG GCG ACG ACG        | 213 |
| <i>OsDR10-9311A</i>           | ... ... .. --- ... --- --- ... ..                                          | 213 |
| <i>OsDR10-NipponbareA</i>     | ... ... .. --- ... --- --- ... ..                                          | 213 |
| <i>OsDR10-O.rufipogonA</i>    | ... ... .. --- ... --- --- ... ..                                          | 213 |
| <i>OsDR10-O.rufipogonB</i>    | ... ... .. --- ... --- --- ... ..                                          | 213 |
| <i>OsDR10-9311B</i>           | ... ... .. --- G.. ATG --- ... ..                                          | 225 |
| <i>OsDR10-NipponbareB</i>     | ... ... .. --- G.. ATG --- ... ..                                          | 225 |
| <i>OsDR10-Nackdong</i>        | ... ... .. --- G.. ATG --- ... ..                                          | 225 |
| <i>OsDR10-O.punctata</i>      | ... ... ..G ... ..C --- ... ACG AAG ... ..GC --- ---                       | 219 |
| <i>OsDR10-O.latifolia</i>     | ..G ... ..G ... ..C --- ... ATG --- ... ..AG. .T. ...                      | 231 |
| <i>OsDR10-O.australiensis</i> | ... ... ..G ... ..G --- ... ATG --- ... ..A .G. ...                        | 231 |
| <i>OsDR10-L.tisserantii</i>   | --- ... ..G ... ..AT TGT ... GCG --- ... ..A ..A ... ..GA --- ...          | 234 |
| <i>OsDR10-L.JX</i>            | ..T ... ..G ... ..GTC --- ... TTG --- ... ..A ... ..GA ... ..              | 222 |
|                               |                                                                            |     |
| <i>OsDR10</i>                 | ACG ACG AAT --- CCC AAG GCC AAG AAG --- --- GGC AGC ACC AAG GAG AAG        | 255 |
| <i>OsDR10-9311A</i>           | ... ... .. --- ... ..                                                      | 255 |
| <i>OsDR10-NipponbareA</i>     | ... ... .. --- ... ..                                                      | 255 |
| <i>OsDR10-O.rufipogonA</i>    | ... ... .. --- ... ..A --- --- ... ..                                      | 255 |
| <i>OsDR10-O.rufipogonB</i>    | ... ... .. --- ... ..                                                      | 255 |
| <i>OsDR10-9311B</i>           | ... ... .. --- ..G ... ..A --- --- ... ..A. ... ..                         | 267 |
| <i>OsDR10-NipponbareB</i>     | ... ... .. --- ..G ... ..A --- --- ... ..A. ... ..                         | 267 |
| <i>OsDR10-Nackdong</i>        | ... ... .. --- ..G ... ..A --- --- ... ..A. ... ..                         | 267 |
| <i>OsDR10-O.punctata</i>      | --- --- --- --- --- --- ... ..A --- --- ... ..A. ... ..                    | 243 |
| <i>OsDR10-O.latifolia</i>     | .T. .T. ..G GAT ..G ..A TTG ... --- --- --- --- --- ---                    | 255 |
| <i>OsDR10-O.australiensis</i> | .T. --- .CG --- --- ... ..                                                 | 267 |
| <i>OsDR10-L.tisserantii</i>   | .T. .T. ..G --- ..G --- ... ..GCA ATT A.. .T. --- ... ..A ...              | 276 |
| <i>OsDR10-L.JX</i>            | .T. .T. --- --- ..G --- ... ..GCT GCC ... ..A. --- --- ... ..              | 258 |
|                               |                                                                            |     |
| <i>OsDR10</i>                 | --- --- GCA GCT GCT AGT GTT GCT AGG GAG GAG <u>GAG GAT GAC GAT GAT GAA</u> | 300 |
| <i>OsDR10-9311A</i>           | --- --- ... ..                                                             | 300 |
| <i>OsDR10-NipponbareA</i>     | --- --- ... ..                                                             | 300 |
| <i>OsDR10-O.rufipogonA</i>    | --- --- ... ..                                                             | 297 |
| <i>OsDR10-O.rufipogonB</i>    | --- --- ... ..                                                             | 297 |
| <i>OsDR10-9311B</i>           | AAG --- ... ..                                                             | 315 |
| <i>OsDR10-NipponbareB</i>     | AAG --- ... ..                                                             | 315 |
| <i>OsDR10-Nackdong</i>        | AAG --- ... ..                                                             | 315 |
| <i>OsDR10-O.punctata</i>      | --- --- --- .TA ... GCA .C. ..C ... ..T ..C ..T ... ..                     | 285 |
| <i>OsDR10-O.latifolia</i>     | --- --- --- .TC ... GCG .C. ... ..A ... ..                                 | 297 |
| <i>OsDR10-O.australiensis</i> | AAG GCA ..T ..A ... GCA .C. ... ..G. ... ..                                | 318 |
| <i>OsDR10-L.tisserantii</i>   | AAG --- --- ..A ... GCA .C. ..C ... ..                                     | 315 |
| <i>OsDR10-L.JX</i>            | AAG AAG --- ... ..GC. .C. ..G --- ... ..                                   | 303 |

**Figure S5. Alignment of *OsDR10* coding sequence with its homologs.** The sequences of *OsDR10-O.punctata*, *OsDR10-O. latifolia*, *OsDR10-L. tisserantii*, and *OsDR10-L. JX* were obtained by PCR amplification followed by sequencing the PCR products. The locations of PCR primers in the coding region are underlined. Dash indicates a gap.
