# Supplementary material for: A Rice Gene of De Novo Origin Negatively Regulates Pathogen-Induced Defense Response
Source: PLOS journal article supplement (doi:10.1371/journal.pone.0004603), 2009-02-25
Supplement: S8 (10.1371/journal.pone.0004603.s008) [file journal.pone.0004603.s008.pdf › journal.pone.0004603.s008.pdf]

**Table S2.** Cosegregation analysis of enhanced resistance to *Xoo* strain PXO61 and existence of the RNAi construct in *OsDR10*-suppressed T<sub>1</sub> families

| Rice material                  | Lesion area (%) <sup>a</sup> | <i>P</i> <sup>b</sup> | RNAi construct <sup>c</sup> |
|--------------------------------|------------------------------|-----------------------|-----------------------------|
| D27RMH3 T <sub>1</sub> family  |                              |                       |                             |
| D27RMH3-1                      | 27.7 ± 2.6                   | 0.1650                | —                           |
| D27RMH3-2                      | 21.1 ± 5.8                   | 0.0033                | +                           |
| D27RMH3-3                      | 14.7 ± 4.2                   | 0.0000                | +                           |
| D27RMH3-4                      | 19.2 ± 3.3                   | 0.0000                | +                           |
| D27RMH3-5                      | 7.7 ± 1.3                    | 0.0000                | +                           |
| D27RMH3-6                      | 20.6 ± 4.2                   | 0.0004                | +                           |
| D27RMH3-7                      | 20.3 ± 3.1                   | 0.0003                | +                           |
| D27RMH3-8                      | 20.8 ± 6.2                   | 0.0031                | +                           |
| D27RMH3-9                      | 27.3 ± 3.2                   | 0.1295                | —                           |
| D27RMH3-10                     | 19.6 ± 3.7                   | 0.0004                | +                           |
| D27RMH3-11                     | 15.3 ± 3.1                   | 0.0000                | +                           |
| D27RMH3-12                     | 23.7 ± 7.5                   | 0.0924                | —                           |
| D27RMH3-14                     | 14.1 ± 4.4                   | 0.0352                | +                           |
| D27RMH3-15                     | 17.9 ± 2.2                   | 0.0001                | +                           |
| D27RMH3-17                     | 14.1 ± 4.9                   | 0.0000                | +                           |
| D27RMH3-21                     | 27.2 ± 4.6                   | 0.4051                | —                           |
| D27RMH3-22                     | 8.2 ± 2.2                    | 0.0000                | +                           |
| D27RMH3-23                     | 27.5 ± 5.8                   | 0.4476                | —                           |
| D27RMH3-24                     | 9.2 ± 2.8                    | 0.0000                | +                           |
| D27RMH3-25                     | 21.2 ± 2.2                   | 0.0253                | +                           |
| D27RMH15 T <sub>1</sub> family |                              |                       |                             |
| D27RMH15-21                    | 24.7 ± 4.8                   | 0.1557                | —                           |
| D27RMH15-22                    | 10.4 ± 6.1                   | 0.0001                | +                           |
| D27RMH15-23                    | 17.2 ± 4.0                   | 0.0033                | +                           |
| D27RMH15-24                    | 6.9 ± 5.2                    | 0.0003                | +                           |
| D27RMH15-25                    | 19.7 ± 5.6                   | 0.0148                | +                           |
| D27RMH15-26                    | 23.1 ± 1.4                   | 0.0670                | —                           |

|                                |            |        |   |
|--------------------------------|------------|--------|---|
| D27RMH15-27                    | 7.4 ± 5.0  | 0.0000 | + |
| D27RMH15-28                    | 17.3 ± 2.8 | 0.0032 | + |
| D27RMH17 T <sub>1</sub> family |            |        |   |
| D27RMH17-21                    | 26.1 ± 6.0 | 0.2799 | — |
| D27RMH17-22                    | 7.9 ± 3.6  | 0.0000 | + |
| D27RMH17-23                    | 3.7 ± 2.1  | 0.0001 | + |
| D27RMH17-24                    | 4.2 ± 2.0  | 0.0001 | + |
| D27RMH17-25                    | 7.1 ± 7.4  | 0.0000 | + |
| D27RMH17-26                    | 3.0 ± 1.5  | 0.0000 | + |
| D27RMH17-27                    | 5.8 ± 3.8  | 0.0000 | + |
| D27RMH17-28                    | 7.3 ± 1.8  | 0.0000 | + |
| D27RMH17-29                    | 2.5 ± 0.9  | 0.0000 | + |
| D27RMH17-30                    | 4.3 ± 1.5  | 0.0000 | + |
| D27RMH17-31                    | 24.5 ± 1.5 | 0.1282 | — |
| D27RMH17-32                    | 9.0 ± 4.6  | 0.0002 | + |
| D27RMH17-33                    | 17.2 ± 5.2 | 0.0038 | + |
| D27RMH17-34                    | 17.1 ± 7.4 | 0.0048 | + |
| D27RMH17-35                    | 1.9 ± 0.3  | 0.0000 | + |
| D27RMH17-36                    | 1.5 ± 1.1  | 0.0000 | + |
| D27RMH17-37                    | 9.7 ± 4.7  | 0.0012 | + |
| D27RMH17-38                    | 10.5 ± 5.5 | 0.0191 | + |
| D27RMH17-39                    | 17.5 ± 4.7 | 0.0042 | + |
| D27RMH17-40                    | 8.0 ± 4.7  | 0.0000 | + |
| Minghui 63<br>(wide type)      | 30.6 ± 4.0 |        |   |

<sup>a</sup>For most of the plants, four to five uppermost fully expanded leaves of each plant were inoculated. The lesion area was recoded at 21 d after bacterial inoculation.

<sup>b</sup>Each *P* value was calculated in comparison with wild type.

<sup>c</sup>Transgenic plants carrying the RNAi construct were detected by PCR amplification using vector-specific primers, pMCGf (5'-GGCTCACCA AACCTTAAACAA-3') and pMCGr (5'-CTGAGCTACACATGCTCAGGTT-3').
