# Supplementary material for: A Rice Gene of De Novo Origin Negatively Regulates Pathogen-Induced Defense Response
Source: PLOS journal article supplement (doi:10.1371/journal.pone.0004603), 2009-02-25
Supplement: S9 (10.1371/journal.pone.0004603.s009) [file journal.pone.0004603.s009.pdf › journal.pone.0004603.s009.pdf]

**Table S3.** Sequence identity (%) among *OsDR10* gene and its homologs from different species

|                         | <i>OsDR10</i> | 9311A | NipponbareA | <i>O. rufipogon</i> A | <i>O. rufipogon</i> B | 9311B | NipponbareB | Nackdong | <i>O. punctata</i> | <i>O. latifolia</i> | <i>O. australiensis</i> | <i>L. tisserantii</i> |
|-------------------------|---------------|-------|-------------|-----------------------|-----------------------|-------|-------------|----------|--------------------|---------------------|-------------------------|-----------------------|
| 9311A                   | 100           |       |             |                       |                       |       |             |          |                    |                     |                         |                       |
| NipponbareA             | 100           | 100   |             |                       |                       |       |             |          |                    |                     |                         |                       |
| <i>O. rufipogon</i> A   | 98            | 98    | 98          |                       |                       |       |             |          |                    |                     |                         |                       |
| <i>O. rufipogon</i> B   | 98            | 98    | 98          | 100                   |                       |       |             |          |                    |                     |                         |                       |
| 9311B                   | 93            | 93    | 93          | 92                    | 92                    |       |             |          |                    |                     |                         |                       |
| NipponbareB             | 93            | 93    | 93          | 92                    | 92                    | 100   |             |          |                    |                     |                         |                       |
| Nackdong                | 93            | 93    | 93          | 92                    | 92                    | 100   | 100         |          |                    |                     |                         |                       |
| <i>O. punctata</i>      | 69            | 69    | 69          | 69                    | 69                    | 67    | 67          | 67       |                    |                     |                         |                       |
| <i>O. latifolia</i>     | 69            | 69    | 69          | 70                    | 70                    | 69    | 69          | 69       | 74                 |                     |                         |                       |
| <i>O. australiensis</i> | 76            | 76    | 76          | 75                    | 75                    | 78    | 78          | 78       | 75                 | 83                  |                         |                       |
| <i>L. tisserantii</i>   | 69            | 69    | 69          | 70                    | 70                    | 72    | 72          | 72       | 71                 | 70                  | 73                      |                       |
| L. JX                   | 73            | 73    | 73          | 73                    | 73                    | 74    | 74          | 74       | 73                 | 80                  | 82                      | 81                    |
