# Supplementary material for: A Rice Gene of De Novo Origin Negatively Regulates Pathogen-Induced Defense Response
Source: PLOS journal article supplement (doi:10.1371/journal.pone.0004603), 2009-02-25
Supplement: S10 (10.1371/journal.pone.0004603.s010) [file journal.pone.0004603.s010.pdf › journal.pone.0004603.s010.pdf]

**Table S4.** Sequence identity/similarity (%) among OsDR10 protein and its homologs in different species

|                  | OsDR10  | 9311A   | NipponbareA | O. rufipogonA | O. rufipogonB | 9311B   | NipponbareB | Nackdong | O. punctata | O. latifolia | O. australiensis | L. tisserantii |
|------------------|---------|---------|-------------|---------------|---------------|---------|-------------|----------|-------------|--------------|------------------|----------------|
| 9311A            | 100/100 |         |             |               |               |         |             |          |             |              |                  |                |
| NipponbareA      | 100/100 | 100/100 |             |               |               |         |             |          |             |              |                  |                |
| O. rufipogonA    | 99/99   | 99/99   | 99/99       |               |               |         |             |          |             |              |                  |                |
| O. rufipogonB    | 99/99   | 99/99   | 99/99       | 100/100       |               |         |             |          |             |              |                  |                |
| 9311B            | 91/91   | 91/91   | 91/91       | 90/90         | 90/90         |         |             |          |             |              |                  |                |
| NipponbareB      | 91/91   | 91/91   | 91/91       | 90/90         | 90/90         | 100/100 |             |          |             |              |                  |                |
| Nackdong         | 91/91   | 91/91   | 91/91       | 90/90         | 90/90         | 100/100 | 100/100     |          |             |              |                  |                |
| O. punctata      | 66/69   | 66/69   | 66/69       | 65/68         | 65/68         | 63/65   | 63/65       | 63/65    |             |              |                  |                |
| O. latifolia     | 61/66   | 61/66   | 61/66       | 61/66         | 61/66         | 59/65   | 59/65       | 59/65    | 67/71       |              |                  |                |
| O. australiensis | 68/74   | 68/74   | 68/74       | 67/73         | 67/73         | 68/75   | 68/75       | 68/75    | 68/71       | 82/83        |                  |                |
| L. tisserantii   | 58/59   | 58/59   | 58/59       | 58/59         | 58/59         | 55/57   | 55/57       | 55/57    | 65/68       | 64/67        | 67/68            |                |
| L.JX             | 66/69   | 66/69   | 66/69       | 65/69         | 65/69         | 61/67   | 61/67       | 61/67    | 65/71       | 78/82        | 75/79            | 72/75          |
