# Supplementary material for: A Rice Gene of De Novo Origin Negatively Regulates Pathogen-Induced Defense Response
Source: PLOS journal article supplement (doi:10.1371/journal.pone.0004603), 2009-02-25
Supplement: S11 (10.1371/journal.pone.0004603.s011) [file journal.pone.0004603.s011.pdf › journal.pone.0004603.s011.pdf]

**Table S5.** Gene-specific primers for qRT-PCR

| Genes            | Accession number | Forward primer (5'-3')    | Reverse primer (5'-3')      |
|------------------|------------------|---------------------------|-----------------------------|
| <i>OsDR10</i>    | CX109127         | TCATCAAGCTGA TTTCATCAGACA | CGTACTTGTAGAACGCCATGGA      |
| <i>AOS2</i>      | AY062258         | CAATACGTGTACTGGTCGAATGG   | AAGGTGTCTGTACCGGAGGAA       |
| <i>CHS</i>       | X89859           | CCGGCGAACTGCGTGTAC        | TTCCTGATCTGCGACTTGTCA       |
| <i>Cht1</i>      | D16221           | CGTGGTGACCAACATCATCA      | GAGTTGAAAGGCCTCTGGTTGT      |
| <i>ICS1</i>      | AK120689         | TATGGTGCTATCCGCTTCGAT     | CGAGAACCGAGCTCTCTTCAA       |
| <i>LOX</i>       | D14000           | GCATCCCCAACAGCACATC       | AATAAAGATTTGGGAGTGACATATTGG |
| <i>NHI</i>       | AY923983         | CACGCCTAAGCCTCGGATTA      | TCAGTGAGCAGCATCCTGACTAG     |
| <i>PAD4</i>      | CX118864         | GCCAGCTCCCCTACGACTTC      | CGTGTGCGGTGTAGGTTGTT        |
| <i>PAL1</i>      | X16099           | GGGCAACCCAGTGACCAA        | CGATTGCCTCGTCGGTCTT         |
| <i>PR10/PBZ1</i> | D38170           | CCCTGCCGAATACGCCTAA       | CTCAAACGCCACGAGAATTTG       |
| <i>PR1a</i>      | AJ278436         | CGTCTTCATCACCTGCAACTACTC  | CATGCATAAACACGTAGCATAGCA    |
| <i>OsWRKY13</i>  | EF143611         | TTTGGGAAAGCGTTGATTAGT     | GCGCACACACACTCCAATC         |
| <i>OsMPK6</i>    | EF174189         | TTGCTACGAGGGCTAAAATATGTG  | GGAACAAATTGCTTGGCTTCA       |
| <i>Actin</i>     | X15865           | TGTATGCCAGTGGTCGTACCA     | CCAGCAAGGTCGAGACGAA         |
